# Supplementary material for: Sulfated Glycosaminoglycans Control the Extracellular Trafficking and the Activity of the Metalloprotease Inhibitor TIMP-3
Source: PubMed Central journal article supplement — Chem Biol. 2014 Oct 23;21(10):1300–9. doi: 10.1016/j.chembiol.2014.07.014 (PMC4210636; doi:10.1016/j.chembiol.2014.07.014), 2014-10-23
Supplement: mmc1.pdf [file mmc1.pdf]

**Chemistry & Biology, Volume 21**

**Supplemental Information**

**Sulfated Glycosaminoglycans Control  
the Extracellular Trafficking and the Activity  
of the Metalloprotease Inhibitor TIMP-3**

**Linda Troeberg, Christopher Lazenbatt, Md. Ferdous Anower-E-Khuda, Craig Freeman,  
Oleg Federov, Hiroko Habuchi, Osami Habuchi, Koji Kimata, and Hideaki Nagase**

**Table S1: Disaccharide composition of chondroitin sulfate preparations used, related to Materials section.**

CSE was purified from bonito or squid using the protocol described in the Materials section. Squid CSE was further fractionated on DEAE-Sephadex. Disaccharide composition of the samples is shown.

|                      | $\Delta$ Di-0S | $\Delta$ Di-4S | $\Delta$ Di-6S | $\Delta$ Di-diS <sub>E</sub> | $\Delta$ Di-diS <sub>D</sub> |
|----------------------|----------------|----------------|----------------|------------------------------|------------------------------|
| bonito CSE           | 1.0            | 38.4           | 9.0            | 39.0                         | 5.1                          |
| Squid CSE fraction 1 | 0.2            | 12.7           | 12.3           | 74.8                         | 0.0                          |
| Squid CSE fraction 2 | 0.1            | 12.0           | 11.9           | 75.9                         | 0.0                          |
| Squid CSE fraction 3 | 0.1            | 11.9           | 11.1           | 77.0                         | 0.0                          |
